# Supplementary material for: A machine learning algorithm with subclonal sensitivity reveals widespread pan-cancer human leukocyte antigen loss of heterozygosity
Source: PubMed Central journal article supplement (PMC9005524; doi:10.1038/s41467-022-29203-w), 2022-04-12
Supplement: 41467_2022_29203_MOESM3_ESM.pdf [file 41467_2022_29203_MOESM3_ESM.pdf]

**Title:** Supplementary Data 1

**Description:** Cell line down sampling. Detailed overview of purity, clonality, number of normal reads, number of tumor reads, percentage of tumor reads and replicates for the cell line down sampling analysis.

**Title:** Supplementary Data 2

**Description:** Primer designs. Primer and probe sequences paired with sample information, lost gene, LOH status prediction.

**Title:** Supplementary Data 3

**Description:** Raw digital PCR results. FAM and VIC copies for each replicate and allele of each (A) cell line dilution and (B) patient.

**Title:** Supplementary Data 4

**Description:** Peptides and log fold change from quantitative immunopeptidomics. Processed quantitative immunopeptidomics data for each patient. Columns include the peptide and the log fold change intensity.

**Title:** Supplementary Software 1

**Description:** The code required to run the DASH software and to regenerate all of the figures and tables. All figures were generated using python 3.7, matplotlib 2.2.3 and seaborn 0.9.0.
